1 **Developmental phenomics suggests that H3K4 monomethylation catalyzed by Trr functions as**  
2 **a phenotypic capacitor**

3 Lautaro Gandara<sup>1,\*</sup>, Albert Tsai<sup>1,\*</sup>,†, Mans Ekelöf<sup>2</sup>, Rafael Galupa<sup>1</sup>, Ella Preger-Ben Noon<sup>3</sup>,  
4 Theodore Alexandrov<sup>2,4,5</sup>, Justin Crocker<sup>1,†</sup>

5 <sup>1</sup>Developmental Biology Unit

6 <sup>2</sup>Structural and Computational Biology Unit, European Molecular Biology Laboratory,  
7 Heidelberg, Germany

8 <sup>3</sup>Department of Genetics and Developmental Biology, The Rappaport Faculty of Medicine and  
9 Research Institute, Technion-Israel Institute of Technology, Haifa, Israel

10 <sup>4</sup>Molecular Medicine Partnership Unit, European Molecular Biology Laboratory, Heidelberg,  
11 Germany

12 <sup>5</sup>Skaggs School of Pharmacy and Pharmaceutical Sciences, University of California San Diego, La  
13 Jolla, CA, USA

14 \*L.G. and A.T. contributed equally to this manuscript, listed in alphabetical order

15 †Corresponding authors: [albert.tsai@embl.de](mailto:albert.tsai@embl.de) (A.T.) and [justin.crocker@embl.de](mailto:justin.crocker@embl.de) (J.C.)

16

17 **Quote:**

18 *“Developmental biologists are often not so much opposed to a role for ecology as they simply*  
19 *ignore it” –Doug Erwin<sup>1</sup>*

20

21 **Abstract:**

22 How epigenetic modulators of gene regulation affect the development and evolution of animals  
23 has been difficult to ascertain. Despite the widespread presence of histone 3 lysine 4  
24 monomethylation (H3K4me1) on enhancers, hypomethylation appears to have minor effects on  
25 animal development and viability. In this study, we performed quantitative, unbiased and multi-  
26 dimensional explorations of key phenotypes on *Drosophila melanogaster* with genetically  
27 induced hypomethylation. Hypomethylation reduced transcription factor enrichment in nuclear  
28 microenvironments, leading to reduced gene expression, and phenotypes outside of standard  
29 laboratory conditions. Our *developmental phenomics* survey further showed that H3K4me1

30 hypomethylation led to context-dependent changes in morphology, metabolism, and behavior.  
31 Therefore, H3K4me1 may contribute to phenotypic evolution as a phenotypic capacitor by  
32 buffering the effects of chance, genotypes and environmental conditions on transcriptional  
33 enhancers.

34

## 35 **Introduction**

36 Gene regulation across animal development is carried out by networks of interacting  
37 transcription factors, modified by the cellular environment, biochemical pathways, metabolic  
38 state, and epigenetic landscapes<sup>2</sup>. These complex regulatory networks are the products of  
39 evolution, subject to continual change in response to variable ecologies<sup>3</sup>. To gain traction into  
40 this complexity, a classical approach in developmental biology has been to simplify the system  
41 using lab-bred model organisms, standardize the experiments under controlled laboratory  
42 conditions, and measure pre-defined variables that are expected to change. Such experiments  
43 have provided a wealth of information focused on dissecting essential components and their  
44 interactions across development.

45 While research programs with a reductionist focus are powerful, such approaches may  
46 not give us the full picture of how systems function in their native environments<sup>4</sup>. Recent  
47 advances in high-throughput phenotyping technologies have facilitated a complementary  
48 approach: the unbiased and unconstrained exploration of several phenotypes and environmental  
49 conditions. New methods in mass spectrometry or automated video tracking are enabling  
50 quantitative and cost-effective explorations of complex phenotypes such as metabolism and  
51 behavior<sup>5</sup>. Furthermore, acquisition of high-dimensional phenotypic data, or “Phenomics”<sup>5</sup>,

52 could study nuanced modulators of gene expression or robustness-conferring elements,  
53 revealing their impacts at the scale of the entire organism and populations.

54 The monomethylation of histone H3 on lysine 4 (H3K4me1) is an epigenetic mark with  
55 disputed roles<sup>6</sup> in gene regulation—while it has been associated with enhancer elements<sup>7–9</sup>  
56 across the genome of different species<sup>9–11</sup>, its loss appears to have minor effects. In mouse  
57 embryonic stem cells, the loss of H3K4me1 from enhancers in Mll3/4 catalytically deficient cells  
58 led to minimal effects on transcription<sup>12,13</sup> and did not disrupt self-renewal<sup>12</sup>. Whilst recent works  
59 suggest that H3K4me1 could be relevant in mouse development<sup>14,15</sup>, H3K4me1 hypomethylation  
60 produced by disrupting the catalytic activity of Trithorax-related (Trr), the main  
61 methyltransferase behind this epigenetic mark in *Drosophila melanogaster*<sup>16</sup>, did not affect  
62 development or viability in this species<sup>17</sup>. The lack of clearly defective phenotypes under standard  
63 laboratory conditions has therefore led to the hypothesis that H3K4me1 tunes enhancers for a  
64 more nuanced response to environmental or genetic stresses<sup>17,18</sup>. However, this subtle effect  
65 contrasts with the presence of the epigenetic mark throughout the *Drosophila* genome<sup>6,9</sup>.

66 To explore comprehensively the effect of H3K4me1 on phenotypes, we designed a  
67 developmental phenomics<sup>5</sup> workflow, and applied it on a H3K4me1 hypomethylation *D.*  
68 *melanogaster* line challenged by various genetic and environmental conditions. Starting from a  
69 single regulatory network in hypomethylated embryos, we demonstrated that H3K4me1 may  
70 confer transcriptional robustness by localizing transcription factors in nuclear  
71 microenvironments. Then we explored the impact of H3K4me1 hypomethylation on a biological  
72 system by performing multiple phenotypic assays on larvae on which a catalytically impaired  
73 version of Trr led to H3K4me1 hypomethylation. Consistent with the ubiquitous presence of

74 H3K4me1 across the genome<sup>8,9,19</sup>, hypomethylation triggered changes in morphology,  
75 metabolism, behavior, and adaptability in response to genetic and environmental challenges. In  
76 sum, global H3K4me1 hypomethylation led to reduced developmental robustness and revealed  
77 phenotypic variation depending on environmental and genetic contexts, supporting the  
78 hypothesis that H3K4me1 acts as a phenotypic capacitor.

79

### 80 **Transcriptionally active *shavenbaby* (*svb*) loci have locally enriched levels of H3K4me1**

81 Previous works showed that global patterns of gene expression were unaffected by  
82 H3K4me1 hypomethylation<sup>12,17</sup>. However, H3K4me1 exhibits clearly different trends between  
83 its global nuclear distribution and enrichment around individual genes compared to other  
84 histone modifications during embryo development<sup>20</sup>, potentially suggesting that it serves  
85 specific regulatory functions at those locations. As an increase in H3K4me1 is associated with  
86 active enhancers<sup>9</sup> and with the activity of most members in the *svb* network (Supplementary  
87 Figure 1A, see *Correlation between H3K4me1 deposition and the regulation of the svb network*  
88 in **Materials and Methods**), we investigated if transcriptionally active *svb* enhancers show  
89 enrichment for H3K4me1. This extensively-studied regulatory network controls the  
90 differentiation of ectodermal cells into trichomes in late embryonic stages. To capture cells  
91 where *svb*-related ventral enhancers are active, we FACS-sorted nuclei from stage 15  
92 *Drosophila melanogaster* embryos from a line with reporter genes driven by different *svb*  
93 enhancers. The “E10” *svb* enhancer drives the expression of GFP, whilst *dsRed* is driven by the  
94 “7” enhancer (Figure 1A). The sorted nuclei were then processed through ChIP-Seq targeting  
95 H3K4me1 (Figure 1B and Supplementary Figure 1B). As expected, H3K4me1 marked all the

96 known embryonic enhancers of *svb* in nuclei from the entire embryo (“All”, Figure 1B). Cells  
97 where the reporter gene for a specific *svb* enhancer is active (“7” or “E10”, Figure 1B) showed  
98 slightly increased levels of monomethylation over the corresponding enhancer and across the  
99 *svb* regulatory region.

100 We performed high-resolution confocal imaging along the ectoderm in the first  
101 abdominal (A1) segment (white box in Figure 1A) of stage 15 embryos (*w<sup>1118</sup>*) to see if H3K4me1  
102 is locally enriched at active *svb* loci. We located cells that are expressing *svb* using fluorescence  
103 *in situ* hybridization (FISH) with RNA probes targeting the *svb* mRNA<sup>21</sup> and stained for H3K4me1  
104 using immunofluorescence (IF) (Figure 1C & D, *Sample preparation and staining for confocal*  
105 *imaging in Materials and Methods*). Plotting the average radial intensity of H3K4me1 as a  
106 function of distance from the transcription site showed that *svb* transcription sites sit on or  
107 near a local maximum (Figure 1E), reminiscent of localized Ubx concentrations around the same  
108 locus<sup>22</sup>. This local enrichment of the mark was stronger than previously observed at *hb*  
109 transcription sites in a previous work<sup>20</sup> (Supplementary Figure 1C & D, adapted from Tsai &  
110 Crocker, 2022). Thus, the enrichment we observed with both CHIP-Seq and imaging suggests  
111 that H3K4me1 is locally enriched at transcriptionally active *svb* enhancers.

112

### 113 **Hypo-monomethylation of H3K4 lowered the transcriptional output of *svb***

114 To identify the effects of losing H3K4me1 on *svb* expression, we disrupted the catalytic  
115 activity of Trr. We used a previously characterized fly line with the *trr<sup>1</sup>* null allele, complemented  
116 with a construct bearing a cysteine-to-alanine (C2398A) mutation (*(trr<sup>1</sup>::trr(C2398A))*, “TrrCA”),  
117 which led to a specific reduction in H3K4me1 deposition, but rescued the *trr<sup>1</sup>*-induced lethality<sup>17</sup>.

118 This TrrCA line produced fertile adults with a normal life span, no gross morphological  
119 abnormalities, and normal gene expression in adult brains and larval wing imaginal discs  
120 compared to control lines<sup>17</sup>. We used the *trr*<sup>1</sup> null line rescued with the wild-type Trr  
121 (*(trr*<sup>1</sup>*;;trr(WT))*, “TrrWT”) as our control to rule out effects from the *trr*<sup>1</sup> line itself.

122 To observe how hypomethylation changes *svb* regulation, we quantified *svb*  
123 transcription sites in the A1 segment of stage 15 embryos using FISH. Even at room  
124 temperature (25 °C), the TrrCA line had numerous transcription sites outside of the ventral  
125 stripes, while there were few in the TrrWT line (Figure 1F & G): the region in front of the A1  
126 stripe had an average of 0.0077 sites per pixel in the hypomethylation line, versus 0.0046 in the  
127 wild-type ( $p < 0.05$  two-tailed Student’s *t*-test, Figure 1H). While the densities of transcription  
128 sites within the A1 ventral stripe were similar between TrrCA and TrrWT (Supplementary Figure  
129 1E), the intensity of *svb* transcription sites in A1 of TrrCA was lower than TrrWT ( $p < 0.01$ ) at 25  
130 °C (Figure 1I). At 29 °C, *svb* transcription site intensity decreased for both TrrCA and TrrWT;  
131 however, it was again lower in the TrrCA line ( $p < 0.01$ ) (Figure 1I).

132 These *svb* transcription sites have previously been characterized as being inside of  
133 transcriptional microenvironments, which are locally enriched for TFs required for *svb*  
134 expression<sup>22</sup>. Thus, we analyzed if hypomethylation affects the local enrichment of the  
135 transcription factor Ubx, the Hox factor driving ventral *svb* expression in the A1 segment (Figure  
136 1J-N). Despite the difference in *svb* intensity, Ubx intensity at *svb* transcription sites was not  
137 different between the TrrWT and TrrCA lines in the ventral region of the *svb* expression pattern  
138 (Figure 1J & M). However, in the lateral region, where *svb* transcription is driven by only a single  
139 enhancer, *DG3*, and trichome development is less robust<sup>21</sup>, Ubx intensity was significantly

140 reduced by H3K4me1 hypomethylation (Figure 1 K, L & N). In sum, H3K4me1 hypomethylation  
141 reduced both the accuracy and levels of *svb* expression and, in the absence of enhancer  
142 redundancy, impaired local *svb* transcriptional environments.

143

144 **Reduced H3K4me1 impaired the robustness of trichome phenotype at increased**  
145 **temperatures**

146 Nuclear microenvironments are essential for preserving transcriptional activity from the  
147 effects of both environmental and genetic perturbations<sup>21,23</sup>. Based on the effect of H3K4me1  
148 hypomethylation on *svb* transcriptional microenvironments, we analyzed the robustness of  
149 trichome development.

150 At room temperature (25 °C), *Trr*WT larvae had no trichomes outside of the ventral  
151 band (Figure 2A). In contrast, *Trr*CA larvae developed extra trichomes outside of the normal  
152 ventral band (Figure 2B, arrows). While *Trr*WT larvae had similar numbers of A1 ventral  
153 trichomes at 25 °C, 29 °C, and 32 °C, the number of trichomes progressively dropped in the  
154 *Trr*CA line as the temperature increased ( $p < 0.05$ , two-tailed Student's *t*-test) (Figure 2C).  
155 Similar trends were observed at the lateral edge; however, the *Trr*CA line had fewer trichomes  
156 than *Trr*WT even at room temperature (Figure 2D). These results indicate that H3K4me1  
157 hypomethylation reduces the robustness of the trichome pattern at increased temperatures,  
158 which is consistent with previous observations showing that H3K4 hypomethylation leads to  
159 environment-dependent phenotype alterations<sup>17</sup>.

160

161 **H3K4me1 hypomethylation revealed hidden genetic variations**

162 We then tested if H3K4me1 deposition maintains robust phenotypes by buffering not only  
163 against environmental stimuli but also different genetic variants. We outcrossed the TrrCA and  
164 TrrWT lines with different genetic backgrounds (see *Morphological analysis of larvae and adult*  
165 *flies* in **Material and Methods**), picking three balancer lines, whose lack of recombination could  
166 impair the purging of slightly deleterious genetic variants<sup>24</sup>. We analyzed the trichome patterns  
167 in larvae generated from these crosses. In all cases, we observed increased frequencies of  
168 aberrant trichome patterns with H3K4me1 hypomethylation (Figure 2E-H and Supplementary  
169 figure 2A). To increase the range of tested genotypes, we performed crosses with three lines  
170 from the Drosophila Genetic Reference Panel (DGRP), where the standing genetic variation  
171 represented in these lines could lead to additional altered phenotypes<sup>25</sup>. We found an increased  
172 frequency of altered trichome patterns produced by hypomethylation in these genetic  
173 backgrounds (Figure 2I-L and Supplementary figure 2A;  $p < 0.05$ , Chi-Squared goodness of fit  
174 test). The specific alterations, both in terms of the affected abdominal segment and the trichome  
175 rows that were missing/modified, were genotype-specific (Figure 2E-L).

176 Furthermore, TrrCA adults from some of these crosses showed increased wing defects,  
177 with one or both wings crumpled (Supplementary Figure 2B-E;  $p < 0.05$ , Chi-Squared goodness of  
178 fit test). Only crosses between TrrCA and specific genotypes showed higher penetrance of this  
179 aberrant wing phenotype compared to TrrWT (Supplementary Figure 2E), again suggesting a  
180 genotype-specific effect of hypomethylation. Thus, these results suggest that H3K4me1 can  
181 conceal genetic variation, leading to higher morphological homogeneity in a population, which  
182 would be consistent with the role of a phenotypic capacitor<sup>24</sup>.

183



## 184 **Hypomethylation altered adaptability to environmental perturbations**

185           Phenotypic capacitors are proposed to facilitate the emergence of novel features, which  
186 are revealed under specific conditions of challenge to the organism<sup>26</sup>. To test this hypothesis, we  
187 analyzed if H3K4me1 hypomethylation can alter the adaptability to non-standard feeding  
188 regimes. We set up mating groups (20 females and 10 males) from the TrrCA or TrrWT lines in  
189 vials containing different food sources: standard lab food (molasses-based), standard lab food  
190 supplemented with yeast paste, or several media produced from organically grown fruits. The  
191 number of eclosed adults after two weeks was similar for TrrCA and TrrWT under standard  
192 feeding conditions, even at 29 °C (Figure 2M, left). In contrast, supplementing this food source  
193 with yeast paste led to a decrease in the offspring number of TrrCA compared to TrrWT.  
194 Increasing the temperature to 29 °C exacerbated this effect (Figure 2M, right). Non-standard  
195 fruit-based food sources yielded more heterogeneous results. Strikingly, in some cases the TrrCA  
196 line had increased offspring numbers. For example, the apple- and pear-based foods showed  
197 increased progeny ( $p = 0.027$  and  $p = 0.026$ , respectively) (Figure 2N). Thus, these results show  
198 that H3K4me1 alters adaptability in a food-dependent manner, to the point of sometimes  
199 increasing adaptability outside of standard laboratory conditions.

200

## 201 **Hypo-monomethylation of H3K4 led to increased adult and larval size**

202           The wide distribution of H3K4me1 across the genome<sup>6</sup> connects it to many active or  
203 primed enhancers. This dense connectivity to regulatory networks of different functions may  
204 have pleiotropic influence on complex traits. Thus, to understand the full impact of H3K4me1

205 hypomethylation on a developmental system, we analyzed phenotypes in these *trr*<sup>1</sup> mutant lines  
206 that are the result of interactions between multiple regulatory and signaling networks.

207 A pronounced effect is that *TrrCA* adult flies were larger than control ones  
208 (Supplementary Figure 3A-C,  $p=0.0103$ ). This observation is consistent with a previous work  
209 showing that *trr* restricts growth in a cell-autonomous manner<sup>27</sup>. However, the effects of  
210 H3K4me1 hypomethylation on the size of different body features on the adult fly had not been  
211 measured before. We employed a morphometric approach<sup>28</sup> and measured the length of three  
212 features that are commonly employed to identify different morphs or species<sup>29,30</sup>: wing intervein  
213 length, the tibia length, and head width. All three structures showed an increase in size in  
214 hypomethylated flies (Supplementary Figure 3D and F-H,  $p=0.008$  for wings,  $p=0.012$  for tibiae,  
215 and  $p=0.024$  for heads). The difference in thorax size, head width, and the wing intervein length  
216 (but not the tibia length) increased with temperature to which the populations were exposed  
217 during development (Supplementary Figure 3E-H).

218 We noted that this effect on size was not restricted to adult flies: hypomethylated larvae  
219 were also larger than control larvae at the same stage of development (Figure 3A-C,  $p < 0.01$ ).  
220 However, pupariation time was not affected by the difference in larval size (Supplementary figure  
221 4A). A possible explanation is that the modulation of H3K4me1 levels may alter lipid metabolism,  
222 a known regulator of larval size<sup>31</sup>.

223

#### 224 **Mass-spectrometry of hypomethylated larvae revealed increased triglycerides synthesis**

225 To test if H3K4me1 hypomethylation alters lipid metabolism, we used MALDI-imaging  
226 mass spectrometry, a technique for spatial lipidomics that can detect various lipids with spatial

227 resolution<sup>32</sup>. Larval populations of TrrCA and TrrWT were cryosectioned to 20  $\mu\text{m}$ -thick sections  
228 (Figure 3D) and analyzed by MALDI-imaging with 10  $\mu\text{m}$  pixel size. Figure 3E shows  
229 representative images, every image showing relative abundances of a particular lipid across a  
230 larva section, demonstrating the detection of lipids associated with larval anatomy.

231 To acquire population-level data through MALDI-imaging, we used a lower spatial  
232 resolution of 100  $\mu\text{m}$  pixel size (Figure 3F). In larvae exposed to standard lab food,  
233 hypomethylation increased triglycerides levels, concomitant with a reduced abundance of  
234 glycerophospholipids (Figure 3G-I, Supplementary Figure 4B). The elevated triglycerides  
235 concentration was confirmed by a biochemical assay (Supplementary Figure 4C).

236 We next tested the effect of hypomethylation when larvae were raised with an apple-  
237 based medium as a non-optimum, carbohydrate-rich food source, where hypomethylation  
238 increased adaptability (Figure 2N). A principal component analysis (PCA) of single-larva  
239 lipidomic profiles integrating intensities of 77 lipids detected across all conditions revealed that  
240 the effects of H3K4me1 hypomethylation is dependent on the feeding regime (i.e. Apple vs.  
241 Standard, Figure 3J, Supplementary figure 4B, D & E). In contrast to standard lab food,  
242 enrichment analysis showed that hypomethylated larvae raised on apples had increased levels  
243 of glycerophosphoethanolamines, with unaltered triglyceride abundance (Supplementary figure  
244 4D). This population-level analysis of lipid signatures suggests that H3K4me1 hypomethylation  
245 widely alters larval lipid metabolism in a food-dependent manner.

246

247 **Hypomethylation altered larval behavior on non-standard food sources**

248 Metabolic states can alter behavioral patterns in *Drosophila*<sup>33</sup>. Therefore, we measured  
249 the crawling velocity of larvae from both *TrrCA* and *TrrWT* that developed either on standard lab  
250 food or apple-based medium. We did not find differences in the mean speed between these two  
251 genotypes on standard lab food (Figure 3K left). However, *TrrCA* larvae on apple-based medium  
252 crawled at a higher velocity than *TrrWT* larvae (Figure 3K right,  $p = 0.014$ ). Moreover, H3K4me1  
253 hypomethylation altered the movement patterns of larvae, as evidenced by their crawling  
254 trajectories (Figure 3L & M). Thus, we also quantified the frequency of exploratory head casting,  
255 a stereotyped larval behavior<sup>34</sup>. Similar to crawling velocities, we only found differences on apple-  
256 based food (Figure 3N,  $p = 0.029$ ). To verify that the effects that we observed in *TrrCA* are linked  
257 to hypomethylation, we generated a new fly line from  $w^{1118}$  using CRISPR/Cas9 to modify the  
258 native *trr* locus. We found that this CRISPR.*TrrCA* line (Supplementary Figure 5A-F) showed many  
259 of the phenotypes that we detected in the *trr*<sup>1</sup>;*TrrCA* line (Supplementary Figure 5G-L), including  
260 similar behavioral alterations. This suggests that the effects of hypomethylation described here  
261 are consistent between populations and possible genetic background variations. In summary,  
262 reduction in H3K4me1 led to changes in larval behavior on food sources not commonly utilized  
263 in the laboratory but available in nature.

264

## 265 Discussion

266 H3K4me1 is a canonical histone modification marking transcriptional enhancers across a  
267 wide array of genomes<sup>35</sup>. Despite its ubiquity, previous works have demonstrated that H3K4me1  
268 deficiency is tolerated<sup>12,17</sup> and that gene expression is mostly unaffected<sup>17</sup>. A possible  
269 explanation has been that it is a “fine-tuner” of enhancer functions—permitting more nuanced

270 gene expression in response to environmental perturbations<sup>17</sup>. Furthermore, it has been  
271 proposed that chromatin regulators may have the ability to buffer gene expression variations,  
272 which might be a general characteristic of large-scale chromatin regulators<sup>36</sup>.

273 Here, we have approached its biological role through a phenomics approach<sup>5</sup> across  
274 animal development—acquiring phenotypic data that range from gene expression to behavior.  
275 We have shown that H3K4me1 provides regulatory robustness to variable environments and  
276 genetic variations (Figure 4). For individual regulatory networks, it preserves correct gene  
277 expression and cell fate determination in the face of environmental stresses by supporting the  
278 enrichment of transcription factors in transcriptional microenvironments.

279 At a population level, H3K4me1 may conceal genetic variations that would otherwise  
280 cause unfavorable phenotypes, potentially functioning as a phenotypic capacitor<sup>24</sup> (Figure 4).  
281 Importantly, H3K4me1 hypomethylation did not completely disrupt any analyzed phenotypes,  
282 but instead altered them in specific ways. For example, trichome and wing defects only appeared  
283 in specific genetic backgrounds (Figure 2E-L). Hypomethylation even increased adaptability to  
284 specific food sources (Figure 2N). The extensive range of phenotypic variation specific to inbred  
285 lines and environments establishes that H3K4me1 has global effects on the storage of cryptic  
286 polymorphisms and their release in response to shifting environments. Together, these results  
287 support the role of H3K4me1 as a phenotypic capacitor to buffer intraspecies genetic variation,  
288 potentially linking this epigenetic mark with the emergence of novel traits.

289 The use of the developmental phenomics workflow introduced here allowed us to  
290 describe how impaired transcriptional robustness propagates across the entire biological system,  
291 altering every analyzed phenotype. Thus, this focus on phenotypic changes across developmental

292 scales provided a mechanistic link between H3K4me1 and its role in fostering developmental  
293 robustness through transcriptional microenvironments (Figure 4). Even though they appear to be  
294 a central feature of gene expression, the regulatory mechanisms underlying these  
295 microenvironments and their resulting physiological implications are just starting to be  
296 explored<sup>23</sup>. DNA accessibility is usually considered a key element in the clustering of transcription  
297 factors and polymerases in transcriptional hubs<sup>37</sup>; however, evidence for a histone mark playing  
298 a role in the organization or maintenance of nuclear microenvironments had not been reported  
299 before. Future research could reveal the full extent of this phenomenon, as well as additional  
300 elements that might collaborate with H3K4me1 in the establishment of nuclear  
301 microenvironments.

302         The diverse effects of H3K4me1 can be conceptualized using the molecular framework  
303 shown in Figure 4. The biochemical function of H3K4me1, including the associated histone mark  
304 H3K4me3<sup>38</sup>, may be to guide multivalent proteins into transcriptional condensates or “hubs”<sup>23</sup>.  
305 In so doing, such histone marks may stabilize localized proteins concentrations and activate them  
306 in the proper place and time during development. Therefore, as originally proposed for Hsp90<sup>24</sup>,  
307 such marks may contribute to phenotypic variance by buffering the functional state of  
308 transcriptional enhancers—in this case, bound transcription factors, other histone marks, and  
309 local co-activator concentrations—that contribute to altered traits through the effects of chance,  
310 genotypes and environments<sup>39</sup>.

311         A novel component of this research was the use of MALDI-imaging mass spectrometry for  
312 the measurement of single-larva and population lipid profiles. Thanks to this analysis, we were  
313 able to reveal distinct metabolic profiles of larvae that outwardly appeared to be wild-type. The

314 same approach can detect small molecules, small peptides, glycans, and exogenous molecules  
315 such as drugs or pollutants<sup>40</sup>. Thus, this opens the avenue towards fast and cost-efficient  
316 metabolic phenotyping at a population scale. Our general approach, combined with advances in  
317 robotics<sup>41,42</sup> and automated behavioral characterization<sup>43</sup>, could turn phenomics into a  
318 standardizable phenotyping method for multiple fields of biological research.

319 In conclusion, this work highlights the risks of stripping away too much of how variable  
320 ecologies affects the function of animal genomes. A common thread that emerged from our  
321 investigations is that “standard laboratory conditions” turned out to be ill-suited for teasing out  
322 the widespread effects of H3K4 monomethylation. These results highlight that incorporating  
323 realistic ecological and environmental contexts into our experimental design is essential for  
324 understanding the regulatory genome and its contribution to evolution and development<sup>44</sup>. In  
325 the future, insights from phenomics and the inclusion of ecologically relevant conditions will  
326 allow us to explore how modulating elements embedded in densely connected biological  
327 networks could lead to the emergence of novel traits and influence the evolutionary dynamics of  
328 entire populations<sup>45–47</sup>.

329

### 330 **Acknowledgments:**

331 Albert Tsai is supported by the German Research Foundation (Deutsche

332 Forschungsgemeinschaft, TS 428/1-1).

333 Mans Ekelöf and Theodore Alexandrov are supported by the ERC Consolidator grant METACELL.

334 (grant agreement 773089).

335 Rafael Galupa and Lautaro Gandara are supported by fellowships from the European Molecular  
336 Biology Laboratory Interdisciplinary Postdoc Programme (EIPOD) under Marie Skłodowska-  
337 Curie Actions COFUND (Grant agreement numbers 664726 and 847543, respectively).

338 Albert Tsai, Mans Ekelöf, Theodore Alexandrov, and Justin Crocker are supported by EMBL.

339 Ella Preger-Ben Noon is supported by the Israel Science Foundation (grant No. 2567/20).

340 The transgenic fly lines containing Trr methylation mutants were a generous gift from A.

341 Shilatifard.

342

343 **Data and material availability statement:** The original images (cuticle preparations and embryo

344 images, organized into zip files) will be available for download and are indexed at:

345 <https://www.embl.de/download/crocker/XXXXXX>. All fly lines will be available upon reasonable

346 request. Spatial lipidomics data is available through the METASPACE platform:

347

## 348 **Materials and Methods:**

### 349 **Fly strains and crosses**

350 All fly strains were kept at standard laboratory conditions at room temperature unless  
351 otherwise noted. We used *w<sup>1118</sup>* as the “wild-type” reference in the experiments shown in  
352 Figure 1A & B, Supplementary Figure 1B-E, and Supplementary Figure 5. Otherwise, we used  
353 lines with non-functional Trithorax-related allele (*trr<sup>1</sup>*) with two different Trr rescue constructs



354 on the third chromosome: the wild-type rescue line (*trr*<sup>1</sup>;;*trr*(WT)) or the hypomethylated line  
355 (*trr*<sup>1</sup>;;*trr*(C2398A)). These lines were established and characterized in a previous work<sup>17</sup>.

356 For experiments examining larval and adult phenotypes with different genetic  
357 backgrounds, we crossed the *trr*<sup>1</sup> lines with balancer stocks obtained from the Bloomington  
358 Stock center (<https://bdsc.indiana.edu/index.html>). They are: ;;*Dr/TM6b* (BS00211), ;;*iso tub-*  
359 *Gal4* (VII)/*TM6sb* (from Maria Leptin) and ;;*act-Gal4/TM6tb* (3954). We also employed lines  
360 #362, #395 and #852 from the *Drosophila Genetic Reference Panel*  
361 (<http://dgrp2.gnets.ncsu.edu/>).

### 362 H3K4me1 ChIP-Seq

363 Stage 15 embryos from a line containing *E10::GFP* and *7::dsRed* transgenes were cross-linked,  
364 dissociated and isolated nuclei were immunostained with anti-GFP and anti-dsRed antibodies.  
365 Following staining with appropriate secondary antibodies, the E10::GFP and 7::dsRed nuclei,  
366 which constitute only 1.6% and 2.1% of the total input material, respectively, were isolated by  
367 fluorescence activated cell sorter (FACS, Supplementary figure 1B). Chromatin from 250,000  
368 nuclei of each cell sub-populations was isolated and used for ChIP with anti-H3K4me1 and anti-  
369 H3 antibodies (abcam) using the iDeal ChIP-seq kit from Diagenode. Libraries were prepared  
370 using the Ovation Ultralow V2 DNA-Seq library preparation kit (NuGen) according to the  
371 manufacturer instructions. Following sequencing adapters and low-quality reads (< Q20) were  
372 trimmed using TrimGalore ([http://www.bioinformatics.babraham.ac.uk/projects/trim\\_galore](http://www.bioinformatics.babraham.ac.uk/projects/trim_galore)).  
373 Mapping was performed with bowtie2<sup>48</sup> using the reference genome dm6 and sensitive end-to-  
374 end presets. Unmapped, multi-mapping reads, reads mapping to chrM (and other non-standard  
375 chromosomes) and duplicate reads were removed. For normalization, we subtracted bigWig

376 files of H3 CHIP-seq samples from bigWig files of H3K4me1 CHIP-seq samples. For visualization  
377 purposes, we averaged normalized replicates (Pearson correlations of 0.86-0.98) and  
378 normalized data was smoothed using a moving average smooth of 500bp.

### 379 **Correlation between H3K4me1 deposition and the regulation of the *svb* network**

380 Segmentation genes with significant H3K4me1 CHIP-seq peaks within 10 kb of the  
381 transcription start sites were identified using the modENCODE dataset H3K4me1; Embryos 12-  
382 16 hours embryonic data<sup>35</sup> (ID 780).

### 383 **Sample preparation and staining for confocal imaging**

384 Embryos for imaging were collected, fixed in 5% PFA and stained according to previous  
385 protocols<sup>49</sup>. To detect *svb* transcription, antisense RNA probes with DIG were made using the  
386 primers from Tsai *et al.*, 2019<sup>21</sup>. For the staining of *svb* and H3K4me1, the samples were first  
387 stained for the histone modification following the IF protocol<sup>22</sup>, re-fixed in 5% PFA in PBT (PBS  
388 with 0.1% Tween 20) for 20 minutes, and then stained for *svb* following the FISH protocol. For  
389 all other experiments with *svb*, we followed the FISH protocol<sup>22</sup>.

390 The following primary and secondary antibodies were used (with dilution ratio in parentheses  
391 followed by the manufacturer and catalog number):

392

393 Primary antibodies

394 Rabbit anti-H3K4me1 (1:250): Merck, 07-436

395 Mouse anti-Ubx (1:20): Developmental Studies Hybridoma Bank, FP3.38-C

396 Sheep anti-DIG: (1:250) Roche, 11333089001

397

398 Secondary antibodies

399 Donkey anti-mouse Alexa 555 (1:500): ThermoFisher, A31570

400 Donkey anti-rabbit Alexa 488 (1:500): ThermoFisher, A21206

401 Donkey anti-rabbit Alexa 555 (1:500): ThermoFisher, A31572

402 Donkey anti-sheep Alexa 488 (1:500): ThermoFisher, A11015

403 Donkey anti-sheep Alexa 633 (1:500): ThermoFisher, A21100

404

405 Stained embryo samples were mounted in ProLong Gold + DAPI Mounting Media (Molecular

406 Probes, Eugene, OR) on a glass slide covered with a number 1.5 high precision coverslip.

#### 407 **Confocal image acquisition and analysis**

408 Confocal images were acquired on a Zeiss LSM 880 confocal microscope (Zeiss,

409 Germany) under a Zeiss Plan-Apochromat 63x/1.40 NA objective with the appropriate laser

410 lines (405, 488 and/or 561 nm) using the Zeiss-recommended optimal resolution. Imaging

411 processing to locate transcription sites and extract spatial data was performed in Fiji/ImageJ<sup>50</sup>

412 with native functions and the 3D ImageJ Suite plugin<sup>51</sup>. Subsequent data analysis was

413 performed in MatLab (MathWorks, Natick, MA) to extract transcription site intensity and radial

414 distributions<sup>21,22</sup>.

#### 415 **Sample preparation to analyze larval phenotypes (cuticle preps etc.)**

416 Cuticle preps were imaged on a phase-contrast microscope (Zeiss, Germany). The

417 number of trichomes in the A1 ventral band between two sensory cells was counted using a

418 find maximum function in Fiji and reported as “Ventral”, as previously described<sup>21</sup>. The number

419 of trichomes in the lateral extremity of the ventral band where the *svb* enhancer *DG3* provides  
420 exclusive coverage was also counted and reported as “Lateral”, as previously described<sup>21</sup>.

#### 421 **Morphological analysis of larvae and adult flies**

422 Female virgins from the *Trr1* mutant lines were crossed with males from different DGRP  
423 stocks or balancer lines (see *Fly strains and crosses*). To analyze the larval trichome pattern,  
424 these crosses were housed in egg collection chambers. Embryos were then collected from  
425 plates and placed in water, on which they developed at 29°C overnight. Afterward, 1st instar  
426 larvae were treated according to standard protocols<sup>52</sup> to prepare cuticles for analysis. Cuticle  
427 preparations were imaged using dark-field and phase-contrast microscopy (Zeiss, Germany).  
428 For the morphological analysis of adult flies, these crosses were placed on fresh vials at 29°C.  
429 After 16 h of egg laying, adults were removed, and the egg-containing vials were left at 29°C for  
430 10 days. Then, the emerged male adults were anesthetized with CO<sub>2</sub>, and wings were analyzed  
431 and photographed employing an Olympus stereoscope.

432 In all crosses, we used the *ttr<sup>1</sup>* mutant lines as the female parental strain, to make sure  
433 that all the males in the offspring were deprived of a wild-type *Trr* allele in the endogenous  
434 locus. As the female offspring is heterozygous for *Trr1*, and thus it is supposed to have normal  
435 H3K4me1 levels, it should be noted that the informed frequencies are likely an  
436 underestimation, and should be considered strictly in a qualitative manner.

#### 437 **Offspring production assay with different temperatures and food sources**

438 Populations of 2-day-old flies from the *Trr1* mutant lines, consisting exactly of 20  
439 females and 10 males, were placed in vials containing standard lab food, standard food  
440 supplemented with yeast paste, or food produced from slightly rotten fruits collected in a local

441 forest (Heidelberg, Germany, GPS Coordinates, 49.38475495291698, 8.71066590019372). After  
442 2 days of egg laying, adults were removed and the vials were placed at 25 °C. For lab food and  
443 lab food with yeast, replicates were carried out at 29 °C. Then, adult offspring were counted in  
444 each vial after 14 days.

445 As standard food, we employed a modified version of the BDSC Cornmeal Food  
446 (<https://bdsc.indiana.edu/information/recipes/bloomfood.html>), consisting of agar 40 g/l , dry  
447 yeast 18 g/l, soya powder 10 g/l, corn syrup 22 g/l, malt extract 80 g/l, corn powder 80 g/l,  
448 propionic acid 6.25 g/l and Nipagin 2.4 g/l. All fruit-based foods were prepared according to  
449 Chhabra *et al.*, 2013<sup>53</sup>. Briefly, the indicated fruits were homogenized in a blender, and then  
450 water was added to a final concentration for the fruit mass of 1,5 g/l. After adding agar (10%  
451 m/v), these preparations were heated in a microwave oven and then dispensed into individual  
452 vials.

### 453 **Genotyping of the Trr locus in the 3<sup>rd</sup> chromosome (rescue constructs) in mixed populations**

454 To identify the Trr allele present in individual flies from the mixed populations, we used  
455 the following primers: TrrWT\_fw (AGTCGCACAAGATACCGTGC), TrrWT\_rv  
456 (TGCAATACAGTGGCAACGTC), TrrCA\_fw (GCACAAGATACCGGCCG) and TrrCA\_rv  
457 (CACGATACACGCAGCGAAAG). Both primer sets were used on each individual gDNA sample, so  
458 flies for which positive results were obtained with both sets were considered as heterozygous,  
459 whilst a single positive was identified as a homozygous fly. For each of the populations kept in  
460 standard food, 50 flies were genotyped per generation. In the case of the populations kept on  
461 apples, all living flies were genotyped in each generation.

### 462 **Larval lipidomics assays with MALDI-imaging**

463 Larval tissues were cryo-sectioned before subjecting them to MALDI imaging mass  
464 spectrometry. To do this, a small population ( $n \approx 10$ ) of 3<sup>rd</sup> instar larvae were embedded in a  
465 previously heated 5% m/v carboxymethylcellulose (Sigma) solution. After solidification, the  
466 obtained molds were sectioned in a Leica CM1950 cryostat at -20C, producing slices with a  
467 thickness of 20  $\mu\text{m}$ . These slices were then mounted on regular glass slides, always aiming to  
468 preserve the middle section (40-60  $\mu\text{m}$ ) of the sectioned larvae.

469 Uniform coating of tissue sections with microcrystalline matrix material is essential for  
470 MALDI-MSI. To process the larval tissues, a 2,5-dihydroxybenzoic acid (DHB) matrix (Sigma  
471 Aldrich) 15mg/ml, dissolved in 70% acetonitrile, was applied onto the samples, mounted on  
472 regular glass slides, by using a TM-Sprayer robotic sprayer (HTX Technologies, Carrboro, NC,  
473 USA). Then, these glass slides containing the larval tissues were mounted onto a custom slide  
474 adaptor and loaded into the MS imaging ion source (AP-SMALDI5, TransMIT GmbH, Giessen,  
475 Germany). Generated ions were co-axially transferred to a high mass-resolution mass  
476 spectrometer (QExactive Plus mass spectrometer, ThermoFisher Scientific). Positive mode MS  
477 analysis was carried out in the full scan mode in the mass range of 200-1100 m/z (resolving  
478 power  $R=140000$  at m/z 200). Metabolite annotation was performed using the METASPACE  
479 cloud software<sup>54</sup>. The Principal Component Analysis of these results was performed on R using  
480 the FactoMineR and factoextra packages (<http://factominer.free.fr/>). Abundance values were  
481 batch-corrected using the ComBat method<sup>55</sup>. Enrichment analysis were carried out using  
482 LION/web<sup>56</sup>.

### 483 **Triglycerides quantification assay**

484 The concentration of triglycerides in *Drosophila* larvae was measured using the  
485 Triglyceride Quantification Colorimetric Kit from Sigma (Cat. # MAK266). Ten, 120 h old (3<sup>rd</sup>  
486 instar), larvae from either the TrrWT or TrrCA line were homogenized in an Eppendorf tube on  
487 a Nonidet P40 Substitute (Sigma, Cat. # 74385) 5% solution. Then, the triglycerides  
488 concentration of each sample was quantified following the instructions provided by the  
489 manufacturer. Absorbance was measured at 570 nm. All metabolic determinations were  
490 carried out on larvae that came from vials with the same larval density (30 larvae per vial), to  
491 avoid effects of crowding on metabolism.

#### 492 **Larval behavioral assays**

493 Larvae from both *trr*<sup>1</sup> mutant lines, either grown in standard lab food or apple-based  
494 food, were placed on agar plates, and their movement was recorded using a regular webcam  
495 (Logitech, 1080p, 30 Hz) for two minutes. Then, the speed of individual larvae was calculated  
496 from their displacement in the x- and y-axes, which was obtained using the MTrack2 tracking  
497 algorithm (ImageJ). The frequency of head casting for individual larvae was manually  
498 measured in each of these videos.

#### 499 **New TrrCA allele developed with CRISPR/Cas9**

500 We cloned two *trr* DNA sequences, one upstream and the other downstream to the  
501 catalytic domain, to act as RNA guides for CRISPR/Cas9 mediated transgenesis, into the pCFD4  
502 plasmid using FSEI and BBSI. In parallel, we synthesized a *trr* DNA sequence that includes the  
503 above-mentioned guides, but altering the nucleotides that are required to replace a Cys by an  
504 Ala at position 2398, to act as template. Silent mutations were also added to prevent Cas9 for  
505 recognizing and cutting this new sequence. This new construct was cloned in the pUC57

506 plasmid. Both construct-containing plasmids were then injected into a fly line that expresses  
507 Cas9 exclusively in the female germ line (Bloomington #51324).

508 Putative transgenic flies were crossed with *w1118* ones, and sequenced. After multiple  
509 crosses with this *w1118* line to homogenize the genetic background, homozygous TrrCA<sub>2</sub> lines  
510 were established.

511 The sequences of the three constructs can be found in Supplementary Table 1.



512 **References:**

- 513 1. Erwin, D. H. Developmental push or environmental pull? The causes of macroevolutionary  
514 dynamics. *History and Philosophy of the Life Sciences* 2017 39:4 **39**, 1–17 (2017).
- 515 2. Davidson, E. H. & Levine, M. S. Properties of developmental gene regulatory networks.  
516 *Proceedings of the National Academy of Sciences of the United States of America* **105**, 20063–  
517 20066 (2008).
- 518 3. Scheiner, S. M. Selection experiments and the study of phenotypic plasticity1. *Journal of*  
519 *Evolutionary Biology* **15**, 889–898 (2002).
- 520 4. Bergelson, J., Kreitman, M., Petrov, D. A., Sanchez, A. & Tikhonov, M. Functional biology in its  
521 natural context: A search for emergent simplicity. *eLife* **10**, (2021).
- 522 5. Houle, D., Govindaraju, D. R. & Omholt, S. Phenomics: The next challenge. *Nature Reviews*  
523 *Genetics* **11**, 855–866 (2010).
- 524 6. Rada-Iglesias, A. Is H3K4me1 at enhancers correlative or causative? *Nature Genetics* **50**, 4–5  
525 (2018).
- 526 7. Heintzman, N. D. *et al.* Histone modifications at human enhancers reflect global cell-type-specific  
527 gene expression. *Nature* **459**, 108–12 (2009).
- 528 8. Barski, A. *et al.* High-Resolution Profiling of Histone Methylations in the Human Genome. *Cell*  
529 **129**, 823–837 (2007).
- 530 9. Bonn, S. *et al.* Tissue-specific analysis of chromatin state identifies temporal signatures of  
531 enhancer activity during embryonic development. *Nature Genetics* **44**, 148–156 (2012).
- 532 10. Nègre, N. *et al.* A cis-regulatory map of the Drosophila genome. *Nature* 2011 471:7339 **471**, 527–  
533 531 (2011).
- 534 11. Bogdanović, O. *et al.* Dynamics of enhancer chromatin signatures mark the transition from  
535 pluripotency to cell specification during embryogenesis. **22**, 2043–2053 (2012).
- 536 12. Dorigi, K. M. *et al.* Mll3 and Mll4 Facilitate Enhancer RNA Synthesis and Transcription from  
537 Promoters Independently of H3K4 Monomethylation. *Molecular Cell* **66**, 568–576.e4 (2017).
- 538 13. Lee, J.-E. *et al.* H3K4 mono- and di-methyltransferase MLL4 is required for enhancer activation  
539 during cell differentiation. *eLife* **2**, e01503 (2013).
- 540 14. Xie, G. *et al.* MLL3/MLL4 methyltransferase activities regulate embryonic stem cell differentiation  
541 independent of enhancer H3K4me1. *bioRxiv* 2020.09.14.296558 (2020)  
542 doi:10.1101/2020.09.14.296558.
- 543 15. Bleckwehl, T. *et al.* Enhancer-associated H3K4 methylation safeguards in vitro germline  
544 competence. *Nature Communications* **12**, 5771 (2021).

- 545 16. Herz, H.-M. *et al.* Enhancer-associated H3K4 monomethylation by Trithorax-related, the  
546 *Drosophila* homolog of mammalian Mll3/Mll4. *Genes & Development* **26**, 2604–2620 (2012).
- 547 17. Rickels, R. *et al.* Histone H3K4 monomethylation catalyzed by Trr and mammalian COMPASS-like  
548 proteins at enhancers is dispensable for development and viability. *Nature Genetics* **49**, 1647–  
549 1653 (2017).
- 550 18. Gibert, J.-M., Mouchel-Vielh, E., Castro, S. De & Peronnet, F. Phenotypic Plasticity through  
551 Transcriptional Regulation of the Evolutionary Hotspot Gene *tan* in *Drosophila melanogaster*.  
552 *PLOS Genetics* **12**, e1006218 (2016).
- 553 19. Heintzman, N. D. *et al.* Histone modifications at human enhancers reflect global cell-type-specific  
554 gene expression. *Nature* **459**, 108–112 (2009).
- 555 20. Tsai, A. & Crocker, J. Nuclear morphogenesis: forming a heterogeneous nucleus during  
556 embryogenesis. *Development* **149**, (2022).
- 557 21. Tsai, A., Alves, M. R. P. & Crocker, J. Multi-enhancer transcriptional hubs confer phenotypic  
558 robustness. *eLife* **8**, (2019).
- 559 22. Tsai, A. *et al.* Nuclear microenvironments modulate transcription from low-affinity enhancers.  
560 *eLife* **6**, e28975 (2017).
- 561 23. Tsai, A., Galupa, R. & Crocker, J. Robust and efficient gene regulation through localized nuclear  
562 microenvironments. *Development* **147**, (2020).
- 563 24. Rutherford, S. L. & Lindquist, S. Hsp90 as a capacitor for morphological evolution. *Nature* **396**,  
564 336–342 (1998).
- 565 25. Mackay, T. F. C. *et al.* The *Drosophila melanogaster* Genetic Reference Panel. *Nature* **482**, 173–  
566 178 (2012).
- 567 26. Masel, J. & Siegal, M. L. Robustness: mechanisms and consequences. *Trends in Genetics* **25**, 395–  
568 403 (2009).
- 569 27. Kanda, H., Nguyen, A., Chen, L., Okano, H. & Hariharan, I. K. The *Drosophila* Ortholog of MLL3 and  
570 MLL4, trithorax related, Functions as a Negative Regulator of Tissue Growth. *Molecular and*  
571 *Cellular Biology* **33**, 1702 (2013).
- 572 28. Mayer, E. On growth and form. By D’Arcy Wentworth Thompson. A new edition. Cambridge and  
573 New York, University Press and Macmillan, 1942, 1116 pp., 554 illustrations, 21½ cm. Price,  
574 \$12.50. *The Anatomical Record* **85**, 111–116 (1943).
- 575 29. McNAMEE, S. & DYTHAM, C. Morphometric discrimination of the sibling species *Drosophila*  
576 *melanogaster* (Meigen) and *D. simulans* (Sturtevant) (Diptera: Drosophilidae). *Systematic*  
577 *Entomology* **18**, 231–236 (1993).
- 578 30. Tran, A. K., Hutchison, W. D. & Asplen, M. K. Morphometric criteria to differentiate *Drosophila*  
579 *suzukii* (Diptera: Drosophilidae) seasonal morphs. *PLOS ONE* **15**, e0228780 (2020).

- 580 31. Texada, M. J., Koyama, T. & Rewitz, K. Regulation of Body Size and Growth Control. *Genetics* **216**,  
581 269–313 (2020).
- 582 32. McDonnell, L. A. & Heeren, R. M. A. Imaging mass spectrometry. *Mass Spectrometry Reviews* **26**,  
583 606–643 (2007).
- 584 33. Mann, K., Deny, S., Ganguli, S. & Clandinin, T. R. Coupling of activity, metabolism and behaviour  
585 across the *Drosophila* brain. **593**, 244–248 (2021).
- 586 34. Berni, J., Pulver, S. R., Griffith, L. C. & Bate, M. Autonomous Circuitry for Substrate Exploration in  
587 Freely Moving *Drosophila* Larvae. *Current Biology* **22**, 1861–1870 (2012).
- 588 35. Roy, S. *et al.* Identification of functional elements and regulatory circuits by *Drosophila*  
589 modENCODE. *Science (New York, N.Y.)* **330**, 1787–97 (2010).
- 590 36. Tirosh, I., Reikhav, S., Sigal, N., Assia, Y. & Barkai, N. Chromatin regulators as capacitors of  
591 interspecies variations in gene expression. *Molecular Systems Biology* **6**, 435 (2010).
- 592 37. Porcelli, D., Fischer, B., Russell, S. & White, R. Chromatin accessibility plays a key role in selective  
593 targeting of Hox proteins. *Genome Biology* **20**, 115 (2019).
- 594 38. Andersson, R. Promoter or enhancer, what’s the difference? Deconstruction of established  
595 distinctions and presentation of a unifying model. *BioEssays* **37**, 314–323 (2015).
- 596 39. Queitsch, C., Sangster, T. A. & Lindquist, S. Hsp90 as a capacitor of phenotypic variation. *Nature*  
597 **417**, 618–624 (2002).
- 598 40. Hsieh, Y., Chen, J. & Korfmacher, W. A. Mapping pharmaceuticals in tissues using MALDI imaging  
599 mass spectrometry. *Journal of Pharmacological and Toxicological Methods* **55**, 193–200 (2007).
- 600 41. Fuqua, T. *et al.* Dense and pleiotropic regulatory information in a developmental enhancer.  
601 *Nature* (2020) doi:10.1038/s41586-020-2816-5.
- 602 42. Fuqua, T. *et al.* An open-source semi-automated robotics pipeline for embryo  
603 immunohistochemistry. *Scientific Reports* 2021 11:1 **11**, 1–16 (2021).
- 604 43. Berman, G. J., Choi, D. M., Bialek, W. & Shaevitz, J. W. Mapping the stereotyped behaviour of  
605 freely moving fruit flies. *Journal of the Royal Society Interface* **11**, (2014).
- 606 44. Bergelson, J., Kreitman, M., Petrov, D. A., Sanchez, A. & Tikhonov, M. Functional biology in its  
607 natural context: A search for emergent simplicity. *eLife* **10**, (2021).
- 608 45. Jovelín, R. & Phillips, P. C. Evolutionary rates and centrality in the yeast gene regulatory network.  
609 *Genome Biology* **10**, R35 (2009).
- 610 46. Yamada, T. & Bork, P. Evolution of biomolecular networks — lessons from metabolic and protein  
611 interactions. *Nature Reviews Molecular Cell Biology* **10**, 791–803 (2009).
- 612 47. Alvarez-Ponce, D., Feyertag, F. & Chakraborty, S. Position Matters: Network Centrality  
613 Considerably Impacts Rates of Protein Evolution in the Human Protein–Protein Interaction  
614 Network. *Genome Biology and Evolution* **9**, 1742–1756 (2017).

- 615 48. Langmead, B. & Salzberg, S. L. Fast gapped-read alignment with Bowtie 2. *Nature Methods* 2012  
616 9:4 9, 357–359 (2012).
- 617 49. Crocker, J. *et al.* Low affinity binding site clusters confer hox specificity and regulatory  
618 robustness. *Cell* **160**, 191–203 (2015).
- 619 50. Schindelin, J. *et al.* Fiji: an open-source platform for biological-image analysis. *Nature methods* **9**,  
620 676–682 (2012).
- 621 51. Schmid, B., Schindelin, J., Cardona, A., Longair, M. & Heisenberg, M. A high-level 3D visualization  
622 API for Java and ImageJ. *BMC Bioinformatics* **11**, 274 (2010).
- 623 52. Stern, D. L. D. L. & Sucena, E. Preparation of cuticles from unhatched first-instar *Drosophila*  
624 larvae. *Cold Spring Harbor protocols* **2011**, pdb.prot065532-pdb.prot065532 (2011).
- 625 53. Chhabra, R., Kolli, S. & Bauer, J. H. Organically Grown Food Provides Health Benefits to  
626 *Drosophila melanogaster*. *PLOS ONE* **8**, e52988 (2013).
- 627 54. Alexandrov, T. *et al.* METASPACE: A community-populated knowledge base of spatial  
628 metabolomes in health and disease. *bioRxiv* 539478 (2019) doi:10.1101/539478.
- 629 55. Johnson, W. E., Li, C. & Rabinovic, A. Adjusting batch effects in microarray expression data using  
630 empirical Bayes methods. *Biostatistics* **8**, 118–127 (2007).
- 631 56. Molenaar, M. R. *et al.* LION/web: a web-based ontology enrichment tool for lipidomic data  
632 analysis. *GigaScience* **8**, 1–10 (2019).

633

634

635

636

637

638 **Figures**

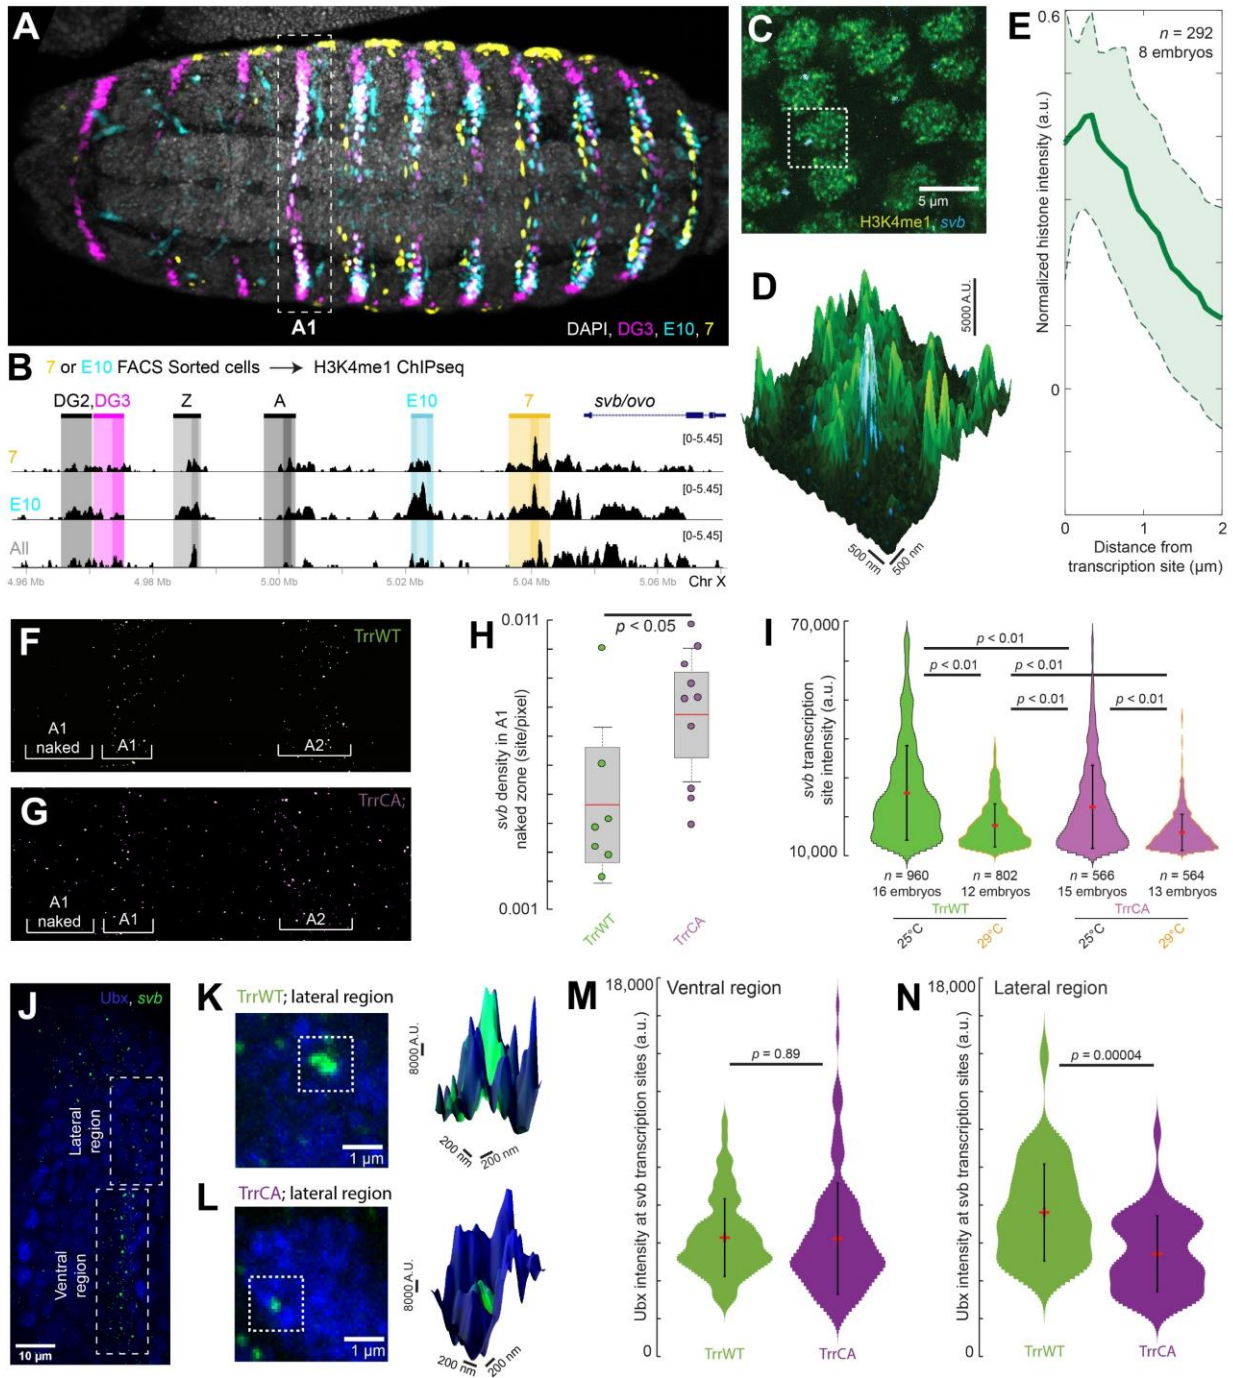

639

640 **Figure 1. H3K4me1 at the *svb* locus improves the robustness of transcriptional output**

641 **through the regulation of transcriptional microenvironments. Related to Supplementary**

642 **Figure 1.**

643 (A) Ventral view of a stage 15 *Drosophila melanogaster* embryo from the fly line used for the  
644 ChIP-Seq experiment stained for the products of the reporter genes driven by the *svb*  
645 enhancers *DG3*, *E10*, and 7. The white dotted box shows the location of the A1 segment along  
646 the embryo.

647 (B) ChIP-Seq experiment using cells from stage 15 *Drosophila melanogaster* embryos sorted by  
648 reporter gene activity. The panel shows H3K4me1 enrichment on a portion of the *svb/ovo*  
649 locus, on cells with an active 7 enhancer (orange), an active *E10* enhancer (cyan), or cells from  
650 the entire embryo (“All”, gray).

651 (C) High resolution confocal imaging experiments in stage 15 *w<sup>1118</sup>* embryos show that active  
652 *svb* transcription sites are in regions with enriched levels of H3K4me1.

653 (D) Zoomed-in view of the dotted box in (C) with the height indicating the intensity of the  
654 H3K4me1 signal.

655 (E) Normalized average H3K4me1 intensity over 292 transcription sites in 8 embryos. The  
656 shaded region is one standard deviation (s.d.).

657 (F & G) *svb* transcription sites at 25 °C on the ventral side of the first two abdominal (A1 & A2)  
658 segments of stage 15 embryos in both *trr<sup>1</sup>* lines.

659 (H) Transcription site density in front of the A1 ventral band (“A1 naked”). Number of embryos:  
660 7 (TrrWT) and 10 (TrrCA). The boxed region is one s.d. and the tails are two s.d. (95 %).

661 (I) Intensity of *svb* transcription sites at different temperatures. The red dot is the mean and the  
662 bar is one s.d.

663 (J) Confocal microscopy image of active *svb* transcription sites and Ubx distribution in the first  
664 abdominal segment of a stage 15 TrrWT embryo.

665 (K & L) High resolution confocal imaging experiments in stage 15 embryos show that H3K4  
666 hypomethylation impairs Ubx recruitment to *svb* transcription sites. Right panels: Zoomed-in  
667 view of the dotted boxes with the height indicating the intensity of the Ubx signal.

668 (M & N) Intensity of the Ubx signal in *svb* transcription sites, measured exclusively in the ventral  
669 (M) or in the DG3-only lateral region (N). The red dot is the mean and the bar is one s.d.

670 Number of embryos: TrrWT = 5 embryos, TrrCA = 8 embryos. Number of analyzed transcription  
671 sites in the ventral region (M): TrrWT n = 69, TrrCA = 139, and in the lateral region (N): TrrWT n  
672 = 38, TrrCA n = 45.

673

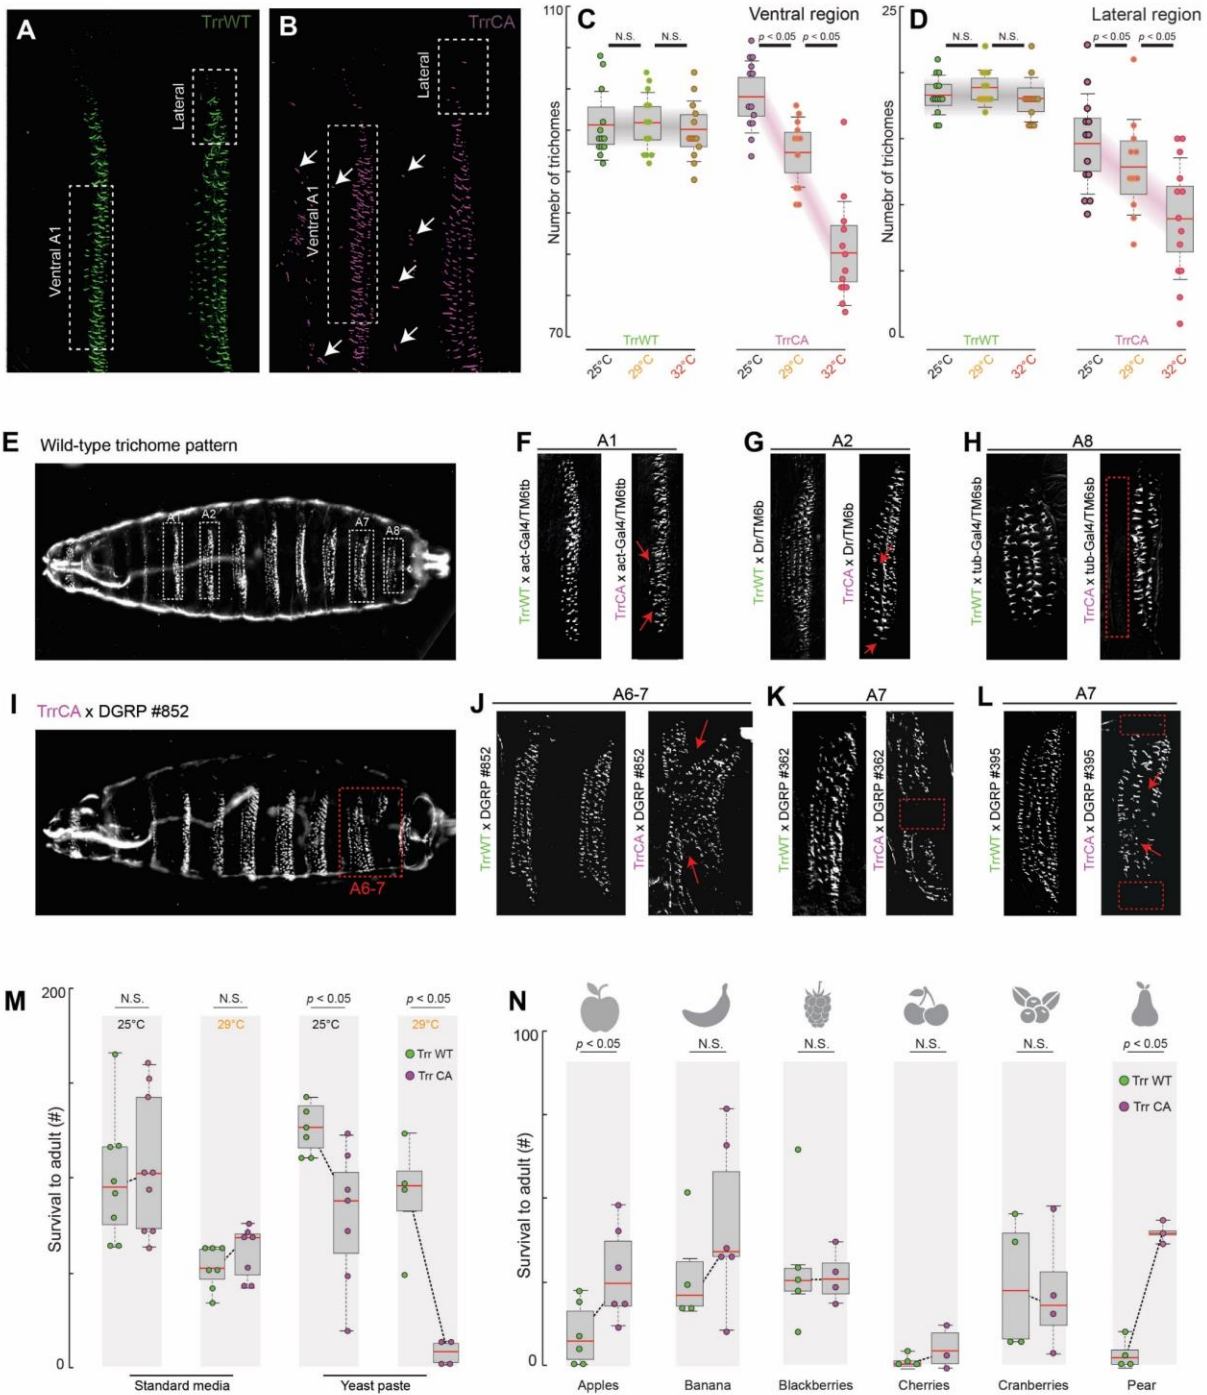

674

675 **Figure 2. H3K4me1 conceals cryptic genetic variation and affects adaptability to specific**  
 676 **environmental conditions. Related to Supplementary Figure 2.**



677 (A & B) Trichome patterns of the first two abdominal segments at 25 °C in both *trr<sup>1</sup>* lines. The  
678 white arrows highlight the presence of ectopic trichomes.

679 (C & D) Number of trichomes in the ventral box and the lateral box, respectively, in both *trr<sup>1</sup>*  
680 lines and at different temperatures. Number of larvae quantified: 13 TrrWT and TrrCA at 25 °C,  
681 13 TrrWT and 12 TrrCA at 29 °C, and 13 TrrWT and TrrCA at 32 °C. N.S.: not significant.

682 (E) Wild-type trichome pattern as observed through dark field microscopy, with boxes  
683 highlighting the specific abdominal segments affected in the different crosses.

684 (F-L) Details of specific abdominal segments (A1, A2, A6, A7 or A8) of cuticle preparations  
685 highlighting the trichome defects. The *trr1* mutant lines were crossed with (F) *act-gal4/TM6tb*,  
686 (G) *Dr/TM6b*, and (h) *tub-Gal4/TM6sb* balancer stocks, or the (I & J) DGRP #852, (K) DGRP #362,  
687 or (L) DGRP #395 lines.

688 (M) The number of offspring flies produced by both *trr<sup>1</sup>* mutant lines with equal numbers of  
689 parental flies in two weeks, on standard lab medium (left) or lab food enriched with yeast paste  
690 (right), and at 25°C or 29°C. Each dot represents an independent replicate population. The  
691 boxed region is one s.d. and the tails are two s.d. (95 %).

692 (N) Similar experiment to (M), but carried out in poorer food sources produced from slightly  
693 rotten organic fruits. The boxed region is one s.d. and the tails are two s.d. (95 %).

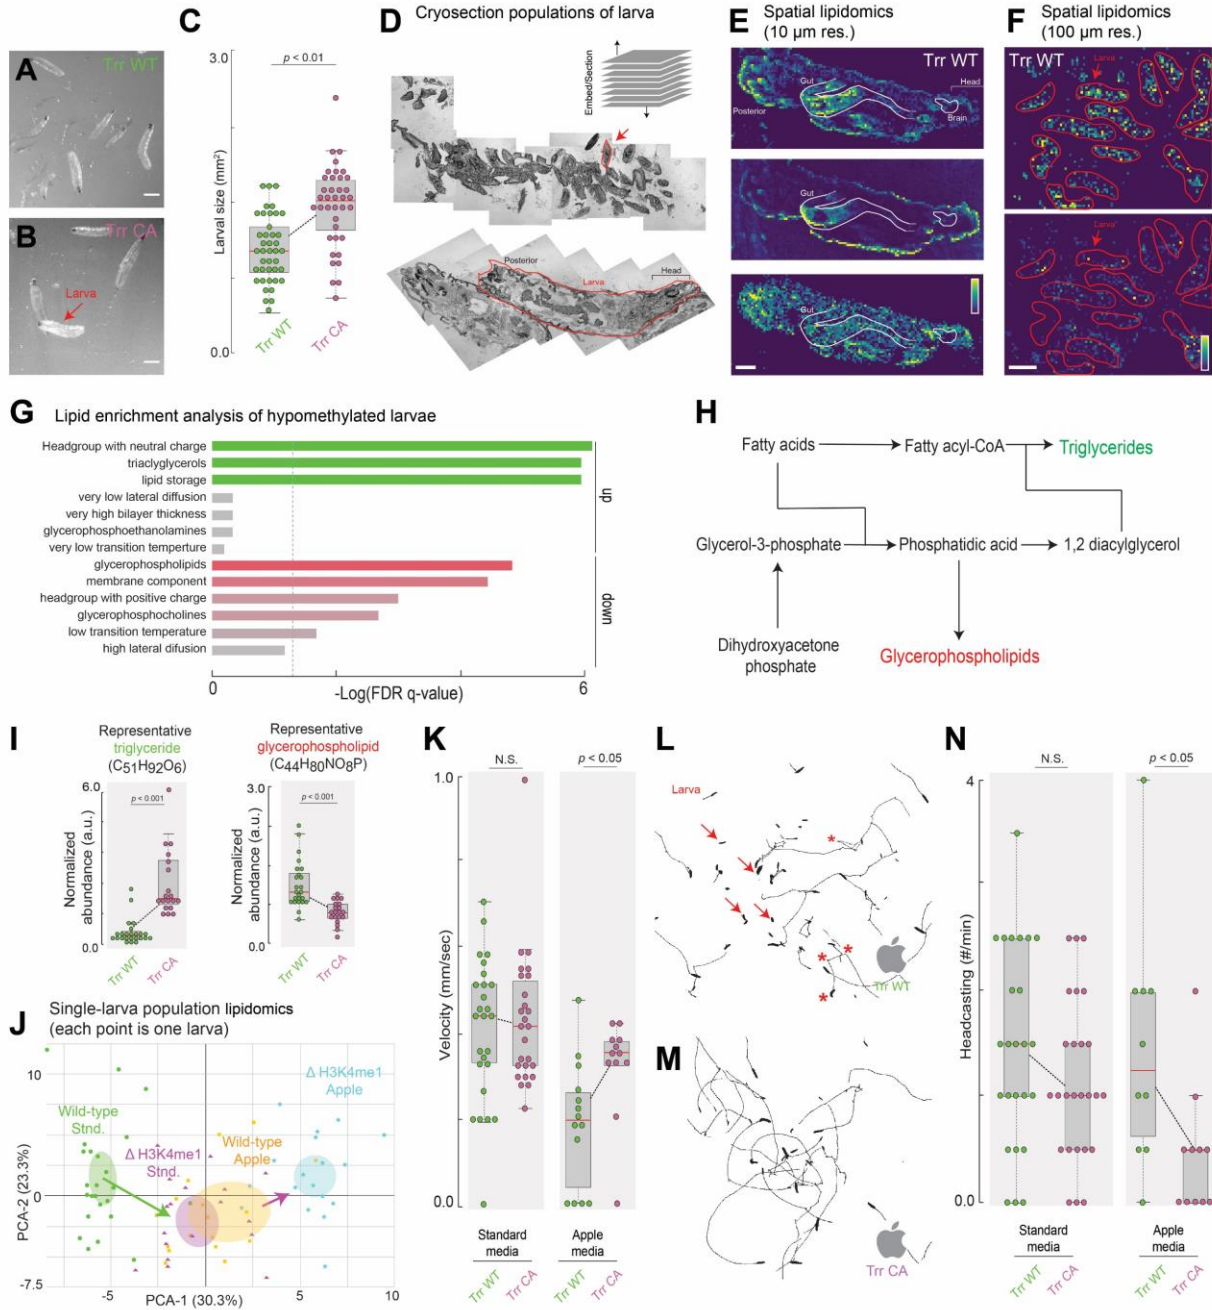

694

695 **Figure 3. H3K4 hypomethylation alters metabolism and behavior. Related to Supplementary**

696 **Figure 4.**

697 (A & B) Pictures of 120 h old larvae from *Trr*WT (A) or *Trr*CA (B) (scale bar = 830  $\mu$ m).

698 (C) The mean size of TrrCA larvae versus TrrWT (n=41 for TrrWT and n=39 for TrrCA). Center  
699 line, mean; upper and lower limits, s.d.; whiskers, 95% CIs. One-tailed t-test comparing the two  
700 Trr1 lines.

701 (D) Upper panel: Middle section of a small larval population. The red arrow highlights an  
702 individual larva. Bottom panel: Middle section of a single larva at higher magnification.

703 (E) High spatial resolution MALDI-imaging analysis of a 3rd instar larva (scale bar = 100  $\mu$ m). The  
704 images show relative intensities of individual lipid species, each for an individual m/z value:  
705 upper panel = 544.3373 (C<sub>26</sub>H<sub>52</sub>NO<sub>7</sub>P); middle panel = 177.0158 (C<sub>7</sub>H<sub>6</sub>O<sub>4</sub>); lower panel =  
706 744.5537 (C<sub>41</sub>H<sub>78</sub>NO<sub>8</sub>P).

707 (F) Medium-resolution MALDI-imaging analysis for a larvae population, showing relative  
708 intensities for a glycerophospholipid (upper panel) at m/z=744.5537 (C<sub>41</sub>H<sub>78</sub>NO<sub>8</sub>P) and a  
709 triglyceride (lower panel) at m/z=815.6525 (C<sub>49</sub>H<sub>92</sub>O<sub>6</sub>); scale bar = 1 mm.

710 (G) Enrichment analysis comparing both trr1 mutant lines (TrrWT vs TrrCA), based on the  
711 abundance values for 77 metabolites consistently detected in all tested conditions (the full list  
712 is in Supplementary Figure 4B).

713 (H) Schematic of lipid metabolism with two products highlighted: triglycerides (green) and  
714 glycerophospholipids (red).

715 (I) Abundance values of a representative triglyceride (left) and glycerophospholipid (right)  
716 obtained by MALDI-imaging mass spec with single-larva resolution. Each dot represents an

717 individual larva with n=24 for TrrWT and n=20 for TrrCA. The boxed region is one s.d. and the  
718 tails are two s.d. (95 %).

719 (J) Principal Components Analysis (PCA) based on single-larva abundance values for 77 different  
720 lipids identified by MALDI imaging mass spec. Each dot represents an individual larva. n=23 for  
721 TrrWT standard, n=20 for TrrCA standard, n=17 for TrrWT apples and n=20 for TrrCA apples.

722 (K) Average velocity of individual larvae grown on either standard lab food or apple-based food.

723 (L & M) Two-minute trajectories of TrrWT (L) or TrrCA (M) larvae grown in apple-based food.  
724 Red arrows point to larvae that remained still throughout the recording. Red stars show the  
725 change in larval paths associated with the head casting behavior.

726 (N) Frequency of head casting of both trr1 mutant lines, on standard or apple-based food.  
727 These measurements only considered larvae that were moving actively.

728 For all panels in the figure: Centre line, mean; upper and lower limits, s.d.; whiskers, 95% CIs.

729 Two-tailed t-test comparing the two trr1 lines; NS not significant. n=26 for TrrWT and TrrCA on  
730 standard food, n=14 for TrrWT on apples, and n=12 for TrrCA on apples.

731

732

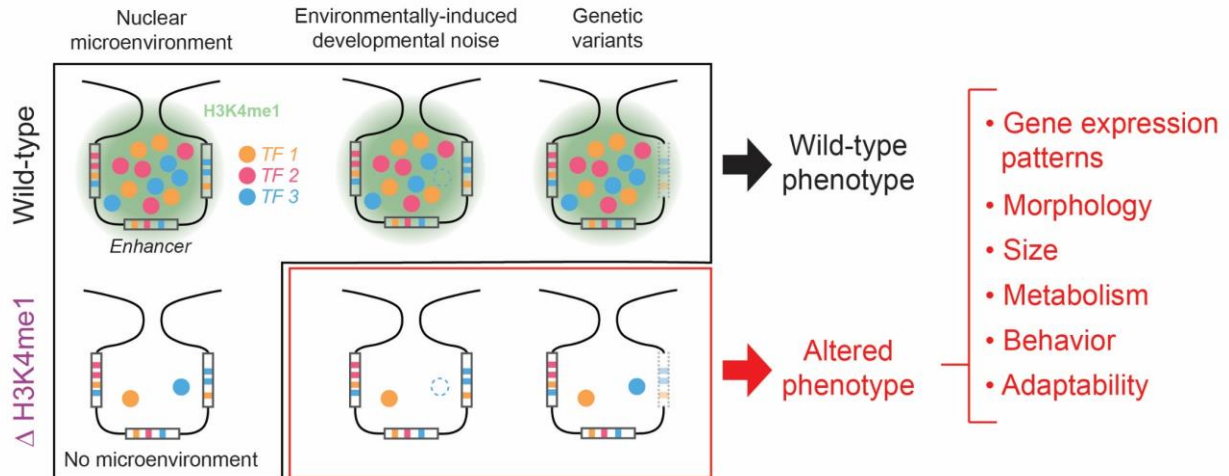

734 **Figure 4: H3K4me1 stabilizes gene transcription through the establishment of nuclear**  
735 **microenvironments, allowing the emergence of alternative states.**

736 H3K4me1 may contribute to the establishment or maintenance of localized transcriptional  
737 environments. These dynamic structures facilitate stable transcriptional outputs, as the local  
738 clustering of TFs and enhancers can minimize the effect of environmental and genetic  
739 perturbations. The absence of H3K4me1 alters phenotypes at many different levels, leading to  
740 specific alterations in size, morphology, metabolism, behavior, and adaptability in context-  
741 dependent ways.

742
